# Supplementary material
Source: PubMed Central journal article supplement (PMC3060080)
Supplement: pgen.1001332.s004.pdf [file pgen.1001332.s004.pdf]

Table S1. Individuals used in each experiment.

| Identification | PHENOTYPES AND DOG INFO |                                       |                 |                                              |                     | USAGE IN DIFFERENT EXPERIMENTS |                                      |                                  |                                          |                                 |                        |                                         |                                           |                                                 |                          |                                             |
|----------------|-------------------------|---------------------------------------|-----------------|----------------------------------------------|---------------------|--------------------------------|--------------------------------------|----------------------------------|------------------------------------------|---------------------------------|------------------------|-----------------------------------------|-------------------------------------------|-------------------------------------------------|--------------------------|---------------------------------------------|
|                | FSF status              | Traditional (T) or Meatmouth (M) type | Age at sampling | serum HA concentration (ug/L <sup>-1</sup> ) | Country of sampling | SNP array                      | Reduction of heterozygosity (Fig 2a) | Homozygosity mapping (Figure 2c) | Genome Wide Association Study (Fig 2b&c) | Targeted re-sequencing (Fig 3a) | Southern blot (Fig 3c) | CNV assay for the meatmouth duplication | CNV assay for the traditional duplication | Correlation between copy number and FSF (Fig 4) | Expression study (Fig 5) | Correlation between HA and CNV (Supp. Fig3) |
| 1              | FSF+                    | M                                     | 3               | -                                            | Swe*                | -                              | N                                    | N                                | N                                        | N                               | Y                      | Y                                       | Y                                         | Y                                               | N                        | N <sup>1</sup>                              |
| 2              | FSF+                    | M                                     | 0,5             | 801                                          | Swe*                | -                              | N                                    | N                                | N                                        | N                               | Y                      | Y                                       | Y                                         | Y                                               | N                        | Y                                           |
| 3              | FSF+                    | M                                     | 4               | 1326                                         | Swe*                | -                              | N                                    | N                                | N                                        | N                               | Y                      | Y                                       | Y                                         | Y                                               | N                        | Y                                           |
| 4              | FSF+                    | M                                     | 4               | 669                                          | Swe*                | -                              | N                                    | N                                | N                                        | N                               | Y                      | Y                                       | Y                                         | Y                                               | N                        | Y                                           |
| 5              | FSF+                    | M                                     | 4               | 1177                                         | Swe*                | -                              | N                                    | N                                | N                                        | N                               | Y                      | Y                                       | Y                                         | Y                                               | N                        | Y                                           |
| 6              | FSF+                    | M                                     | 4,5             | 1572                                         | Swe*                | -                              | N                                    | N                                | N                                        | N                               | Y                      | Y                                       | Y                                         | Y                                               | N                        | Y                                           |
| 7              | FSF+                    | M                                     | 6               | 1593                                         | Swe*                | -                              | N                                    | N                                | N                                        | N                               | Y                      | Y                                       | Y                                         | Y                                               | N                        | Y                                           |
| 8              | FSF+                    | M                                     | 6               | 440                                          | Swe*                | -                              | N                                    | N                                | N                                        | N                               | Y                      | Y                                       | Y                                         | Y                                               | N                        | Y                                           |
| 9              | FSF+                    | M                                     | 7,5             | 378                                          | Swe*                | -                              | N                                    | N                                | N                                        | N                               | Y                      | Y                                       | Y                                         | Y                                               | N                        | Y                                           |
| 10             | FSF+                    | M                                     | 4               | -                                            | US                  | 27K                            | N                                    | Y                                | Y                                        | Y                               | N                      | Y                                       | Y                                         | Y                                               | N                        | N <sup>1</sup>                              |
| 11             | FSF+                    | M                                     | 1               | -                                            | US                  | 50K                            | Y                                    | Y                                | Y                                        | Y                               | N                      | N                                       | N                                         | N                                               | N                        | N <sup>1</sup>                              |
| 12             | FSF+                    | M                                     | 1               | -                                            | US                  | 50K                            | Y                                    | Y                                | Y                                        | Y                               | N                      | Y                                       | Y                                         | Y                                               | N                        | N <sup>1</sup>                              |
| 13             | FSF+                    | M                                     | 4               | -                                            | US                  | 50K                            | Y                                    | Y <sup>1</sup>                   | Y <sup>1</sup>                           | N                               | N                      | N                                       | N                                         | N                                               | N                        | N <sup>1</sup>                              |
| 14             | FSF+                    | M                                     | 7               | -                                            | US                  | 50K                            | Y                                    | Y                                | Y                                        | N                               | N                      | N                                       | N                                         | N                                               | N                        | N <sup>1</sup>                              |
| 15             | FSF+                    | M                                     | 7               | -                                            | US                  | 50K                            | Y                                    | Y                                | Y                                        | N                               | N                      | N                                       | N                                         | N                                               | N                        | N <sup>1</sup>                              |
| 16             | FSF+                    | M                                     | 8               | -                                            | US                  | 50K                            | Y                                    | Y                                | Y                                        | N                               | N                      | N                                       | N                                         | N                                               | N                        | N <sup>1</sup>                              |
| 17             | FSF+                    | M                                     | 8               | -                                            | US                  | 50K                            | Y                                    | Y <sup>1</sup>                   | Y <sup>1</sup>                           | N                               | N                      | Y                                       | Y                                         | Y                                               | N                        | N <sup>1</sup>                              |
| 18             | FSF+                    | M                                     | 9               | -                                            | US                  | 50K                            | Y                                    | Y                                | Y                                        | N                               | N                      | N                                       | N                                         | N                                               | N                        | N <sup>1</sup>                              |
| 19             | FSF+                    | M                                     | 9               | -                                            | US                  | 50K                            | Y                                    | Y                                | Y                                        | N                               | N                      | Y                                       | Y                                         | Y                                               | N                        | N <sup>1</sup>                              |
| 20             | FSF+                    | M                                     | 11              | -                                            | US                  | 27K                            | N                                    | Y                                | Y                                        | N                               | N                      | Y                                       | Y                                         | Y                                               | N                        | N <sup>1</sup>                              |
| 21             | FSF+                    | M                                     | -               | -                                            | US                  | 50K                            | Y                                    | Y                                | Y                                        | N                               | N                      | N                                       | N                                         | N                                               | N                        | N <sup>1</sup>                              |
| 22             | FSF+                    | M                                     | -               | -                                            | US                  | 27K                            | N                                    | Y                                | Y                                        | N                               | N                      | N                                       | N                                         | N                                               | N                        | N <sup>1</sup>                              |
| 23             | FSF+                    | M                                     | -               | -                                            | US                  | 50K                            | Y                                    | Y                                | Y                                        | N                               | N                      | Y                                       | Y                                         | Y                                               | N                        | N <sup>1</sup>                              |
| 24             | FSF+                    | M                                     | 2               | 286                                          | US                  | -                              | N                                    | N                                | N                                        | N                               | N                      | Y                                       | Y                                         | Y                                               | N                        | Y                                           |
| 25             | FSF+                    | M                                     | 3               | 1021                                         | Swe*                | -                              | N                                    | N                                | N                                        | N                               | N                      | Y                                       | Y                                         | Y                                               | N                        | Y                                           |
| 26             | FSF+                    | M                                     | 2               | -                                            | US                  | 50K                            | Y                                    | N                                | N                                        | N <sup>2</sup>                  | N                      | N                                       | N                                         | N                                               | N                        | N <sup>1</sup>                              |
| 27             | FSF+A                   | M                                     | 5               | 329                                          | Den                 | -                              | N                                    | N                                | N                                        | N                               | N                      | Y                                       | Y                                         | Y                                               | N                        | Y                                           |
| 28             | FSF+A                   | M                                     | 3               | -                                            | Swe*                | -                              | N                                    | N                                | N                                        | N                               | Y                      | Y                                       | Y                                         | Y                                               | N                        | N <sup>1</sup>                              |
| 29             | FSF+A                   | M                                     | -               | -                                            | Swe*                | -                              | N                                    | N                                | N                                        | N                               | N                      | Y                                       | Y                                         | Y                                               | N                        | N <sup>1</sup>                              |
| 30             | FSF+A                   | M                                     | 5,5             | 1340                                         | Swe*                | -                              | N                                    | N                                | N                                        | N                               | N                      | Y                                       | Y                                         | Y                                               | N                        | Y                                           |
| 31             | FSF+A                   | M                                     | 12              | -                                            | US                  | 50K                            | Y                                    | Y                                | Y                                        | N                               | N                      | Y                                       | N                                         | N                                               | N                        | N <sup>1</sup>                              |
| 32             | FSF+A                   | M                                     | 4               | -                                            | US                  | 27K                            | N                                    | Y                                | Y                                        | N                               | N                      | Y                                       | Y                                         | Y                                               | N                        | N <sup>1</sup>                              |
| 33             | FSF+A                   | M                                     | 4               | -                                            | US                  | 27K                            | N                                    | Y                                | Y                                        | N                               | N                      | Y                                       | Y                                         | Y                                               | N                        | N <sup>1</sup>                              |
| 34             | FSF+A                   | M                                     | 7               | -                                            | US                  | 50K                            | Y                                    | Y                                | Y                                        | N                               | N                      | N                                       | N                                         | N                                               | N                        | N <sup>1</sup>                              |
| 35             | FSF+A                   | M                                     | 8               | -                                            | US                  | 50K                            | Y                                    | Y                                | Y                                        | N                               | N                      | Y                                       | Y                                         | Y                                               | N                        | N <sup>1</sup>                              |
| 36             | FSF+A                   | M                                     | 8               | -                                            | US                  | 50K                            | Y                                    | Y                                | Y                                        | N                               | N                      | Y                                       | Y                                         | Y                                               | N                        | N <sup>1</sup>                              |
| 37             | FSF+A                   | M                                     | 10              | -                                            | US                  | 27K                            | N                                    | Y                                | Y                                        | N                               | N                      | N                                       | N                                         | N                                               | N                        | N <sup>1</sup>                              |
| 38             | FSF+A                   | M                                     | 10              | -                                            | US                  | 50K                            | Y                                    | Y                                | Y                                        | N                               | N                      | Y                                       | Y                                         | Y                                               | N                        | N <sup>1</sup>                              |
| 39             | FSF+A                   | M                                     | -               | -                                            | US                  | 50K                            | Y                                    | Y                                | Y                                        | N                               | N                      | N                                       | N                                         | N                                               | N                        | N <sup>1</sup>                              |
| 40             | FSF+A                   | M                                     | -               | -                                            | US                  | 50K                            | Y                                    | N                                | N                                        | N <sup>3</sup>                  | N                      | N                                       | Y                                         | Y                                               | N                        | N <sup>1</sup>                              |
| 41             | FSF+A                   | M                                     | -               | 437                                          | US                  | 50K                            | Y                                    | Y                                | Y                                        | N                               | N                      | Y                                       | Y                                         | Y                                               | N                        | Y                                           |
| 42             | atypical FSF            | M                                     | 8               | -                                            | Swe*                | -                              | N                                    | N                                | N                                        | N                               | Y                      | N                                       | N                                         | N                                               | N                        | N <sup>1</sup>                              |
| 43             | atypical FSF            | M                                     | 4               | 1333                                         | Swe*                | -                              | N                                    | N                                | N                                        | N                               | N                      | Y                                       | N                                         | N                                               | N                        | Y                                           |
| 44             | atypical FSF            | M                                     | 2               | -                                            | US                  | 50K                            | Y                                    | N                                | N                                        | N <sup>2</sup>                  | N                      | N                                       | N                                         | N                                               | N                        | N <sup>1</sup>                              |
| 45             | atypical FSF            | M                                     | -               | -                                            | US                  | 50K                            | Y                                    | N                                | N                                        | N <sup>2</sup>                  | N                      | N                                       | N                                         | N                                               | N                        | N <sup>1</sup>                              |
| 46             | H+                      | T                                     | 5               | 73                                           | Fin/HK              | 50K                            | N                                    | Y                                | Y                                        | Y                               | Y                      | Y                                       | Y                                         | Y                                               | N                        | Y                                           |
| 47             | H+                      | T                                     | 5               | 266                                          | Norway***           | 50K                            | N                                    | Y                                | Y                                        | Y                               | Y                      | Y                                       | Y                                         | Y                                               | N                        | Y                                           |
| 48             | H+                      | M                                     | 5               | -                                            | Swe*                | -                              | N                                    | N                                | N                                        | N                               | N                      | Y                                       | Y                                         | Y                                               | N                        | N <sup>1</sup>                              |
| 49             | H+                      | M                                     | 0,5             | 215                                          | Swe*                | -                              | N                                    | N                                | N                                        | N                               | Y                      | Y                                       | Y                                         | Y                                               | N                        | Y                                           |
| 50             | H+                      | M                                     | 4,5             | 924                                          | Swe*                | -                              | N                                    | N                                | N                                        | N                               | N                      | Y                                       | Y                                         | Y                                               | N                        | Y                                           |
| 51             | H+                      | M                                     | -               | -                                            | US                  | -                              | N                                    | N                                | N                                        | N                               | N                      | Y                                       | Y                                         | Y                                               | N                        | N <sup>1</sup>                              |
| 52             | H+                      | M                                     | 5               | -                                            | US                  | 50K                            | Y                                    | Y                                | Y                                        | N                               | N                      | Y                                       | Y                                         | Y                                               | N                        | N <sup>1</sup>                              |
| 53             | H+                      | M                                     | 6               | -                                            | US                  | 27K                            | N                                    | Y                                | Y                                        | N                               | N                      | N                                       | N                                         | N                                               | N                        | N <sup>1</sup>                              |
| 54             | H+                      | M                                     | 6               | -                                            | US                  | 50K                            | Y                                    | Y                                | Y                                        | N                               | N                      | Y                                       | Y                                         | Y                                               | N                        | N <sup>1</sup>                              |
| 55             | H+                      | M                                     | 8               | -                                            | US                  | 50K                            | Y                                    | Y                                | Y                                        | N                               | N                      | Y                                       | Y                                         | Y                                               | N                        | N <sup>1</sup>                              |
| 56             | H+                      | M                                     | 8               | -                                            | US                  | 50K                            | Y                                    | Y                                | Y                                        | N                               | N                      | Y                                       | Y                                         | Y                                               | N                        | N <sup>1</sup>                              |
| 57             | H+                      | M                                     | 9               | -                                            | US                  | 50K                            | Y                                    | Y                                | Y                                        | N                               | N                      | N                                       | N                                         | N                                               | N                        | N <sup>1</sup>                              |
| 58             | H+                      | T                                     | 9               | -                                            | US                  | 27K                            | N                                    | Y                                | Y                                        | N                               | N                      | Y                                       | Y                                         | Y                                               | N                        | N <sup>1</sup>                              |
| 59             | H+                      | M                                     | 9               | -                                            | US                  | 50K                            | Y                                    | Y                                | Y                                        | N                               | N                      | Y                                       | Y                                         | Y                                               | N                        | N <sup>1</sup>                              |
| 60             | H+                      | M                                     | 10              | -                                            | US                  | 50K                            | Y                                    | Y                                | Y                                        | N                               | N                      | Y                                       | Y                                         | Y                                               | N                        | N <sup>1</sup>                              |



|                      |         |   |   |   |       |     |   |   |   |   |   |   |   |   |   |   |   |
|----------------------|---------|---|---|---|-------|-----|---|---|---|---|---|---|---|---|---|---|---|
| 137                  | unknown | M | - | - | Spain | 22K | Y | N | N | N | N | N | N | N | N | N | N |
| 138-166 <sup>§</sup> | unknown | - | - | - | -     | -   | - | N | N | N | N | Y | N | N | N | N | N |

Y = Yes, the individual is used in this experiment, N= No, the individual is not used in this experiment

"-" = information is missing

<sup>1</sup> removed because of population substructure (outlier)

<sup>2</sup> removed because of uncertain diagnose

<sup>3</sup> removed because of low call rate

<sup>4</sup> removed because of unknown HA concentration

\* Sweden, import from US or with US parents/grandparents

\*\*Finland, Hong Kong import

\*\*\*Norway, with US grandparents

\*\*\*\*Sweden, Spanish import

HK = Hong Kong import

<sup>§</sup>29 Shar-Pei were grouped together in the table since no further information was available, however each individual was typed seperately
