# Supplementary material
Source: PubMed Central journal article supplement (PMC3060080)
Supplement: pgen.1001332.s005.pdf [file pgen.1001332.s005.pdf]

**Table S2. SNPs highly associated with Familial Shar-Pei Fever on Chromosome 13.**

A summary of 7 SNPs on chromosome 13 that together formed a peak of association to the susceptibility of Familial Shar-Pei Fever (FSF). 41 Shar-Pei classified as affected ( $n=24$ , FSF+ and FSF+A) and unaffected ( $n=17$ , H+) by FSF were genotyped with an 18 K SNPs and analyzed based on 100,000 permutations. After correcting for stratification two outliers (affected by FSF) were removed and the association remained (best SNP,  $p = 0.01$ ).

| Position (bp)    | Before removing outliers<br>(24 cases + 17 controls) |                        | After removing outliers<br>(22 cases + 17 controls) |                        |
|------------------|------------------------------------------------------|------------------------|-----------------------------------------------------|------------------------|
|                  | p raw<br>(not permuted)                              | p genome<br>(permuted) | p raw<br>(not permuted)                             | p genome<br>(permuted) |
| chr13:27,913,803 | 7.0e-07                                              | 0.005                  | 2.3e-06                                             | 0.014                  |
| chr13:28,879,708 | 1.3e-06                                              | 0.010                  | 3.5e-06                                             | 0.023                  |
| chr13:30,775,049 | 2.5e-06                                              | 0.019                  | 8.0e-06                                             | 0.052                  |
| chr13:29,058,515 | 2.9e-06                                              | 0.023                  | 7.3e-06                                             | 0.049                  |
| chr13:22,467,679 | 7.0e-06                                              | 0.049                  | 2.1e-05                                             | 0.12                   |
| chr13:23,430,873 | 7.0e-06                                              | 0.051                  | 2e-05                                               | 0.12                   |
| chr13:29,629,329 | 1.0e-05                                              | 0.077                  | 2.6e-05                                             | 0.15                   |
