# Supplementary material
Source: PubMed Central journal article supplement (PMC3060080)
Supplement: pgen.1001332.s006.pdf [file pgen.1001332.s006.pdf]

**Table S3. Comparative alignment of *HAS2* and *HAS2* antisense.**

| <b><i>HAS2</i></b>      |                                     |                     |                                   |                            |
|-------------------------|-------------------------------------|---------------------|-----------------------------------|----------------------------|
| <b>Location (human)</b> | <b>Position in the human genome</b> | <b>Location dog</b> | <b>Position in the dog genome</b> | <b>Alignment dog-human</b> |
| 5'UTR /Exon 1           | chr8: 122653093-122653630           | Not annotated       | Not annotated                     | chr13: 23378112-23378663   |
| Exon 2 coding           | chr8: 122640954-122641580           | Exon 1 coding       | chr13: 23364286-23364912          | n/a                        |
| Exon 3 coding           | chr8: 122629345-122629446           | Exon 2 coding       | chr13:23351193-23351294           | n/a                        |
| Exon 4 coding           | chr8: 122626349 -122627278          | Exon 3 coding       | chr13:23348773-23349702           | n/a                        |
| Exon 4 / 3'UTR          | chr8: 122625271-122626348           | Not annotated       | Not annotated                     | chr13: 23347739-23348772   |
| <b><i>HAS2AS</i></b>    |                                     |                     |                                   |                            |
| <b>Location (human)</b> | <b>Position in the human genome</b> | <b>Location dog</b> | <b>Position in the dog genome</b> | <b>Alignment dog-human</b> |
| Exon 1 UTR              | chr8: 122651586-122652408           | Not annotated       | Not annotated                     | chr13: 23376703-23377412   |
| Exon 2 UTR              | chr8: 122653430-122653686           | Not annotated       | Not annotated                     | chr13: 23378472-23378726   |
| Exon 3 UTR              | chr8: 122654824-122654971           | Not annotated       | Not annotated                     | chr13: 23379839-23379993   |
| Exon 4 UTR              | chr8: 122656506-122656933           | Not annotated       | Not annotated                     | chr13: 23381680-23382156   |
