# Supplementary material
Source: PubMed Central journal article supplement (PMC3060080)
Supplement: pgen.1001332.s007.pdf [file pgen.1001332.s007.pdf]

**Table S4. Summary statistics of the targeted resequencing.**

Data is reported for the full or repeat-masked target sequence (CanFam 2.0 Chr13: 22,937,592-24,414,650). Three control breeds (Pug, Neapolitan Mastiff, Standard Poodle) and two of each type of Shar-Pei (M= Meatmouth type and T= traditional type) were sequenced. The two traditional type Shar-Pei were sequenced at different read lengths but were aligned using the same strict criteria (allowing two mismatches per read) and therefore vary in the percentage of mapped reads as well as coverage when compared to the other individuals. Individual 7 was sequenced from whole genome amplified material and this may have impacted the ability to map reads and detect SNP.

| Nr | Breed        | No of reads | Full Reference Sequence in Target Region |                           |                         | Repeat-masked Reference Sequence in Target Region |                           |                         |
|----|--------------|-------------|------------------------------------------|---------------------------|-------------------------|---------------------------------------------------|---------------------------|-------------------------|
|    |              |             | % mapped <sup>1</sup>                    | Coverage (x) <sup>2</sup> | No of SNPs <sup>3</sup> | % mapped <sup>1</sup>                             | Coverage (x) <sup>2</sup> | No of SNPs <sup>3</sup> |
| 1  | Pug          | 9,868,613   | 74                                       | 178                       | 3381                    | 45                                                | 171                       | 1630                    |
| 2  | N. Mastiff   | 11,011,789  | 92                                       | 246                       | 2773                    | 60                                                | 256                       | 1380                    |
| 3  | Poodle       | 8,672,727   | 79                                       | 165                       | 2646                    | 48                                                | 161                       | 1356                    |
| 4  | Shar-Pei (M) | 10,789,354  | 90                                       | 236                       | 3399                    | 58                                                | 245                       | 1791                    |
| 5  | Shar-Pei (M) | 9,715,905   | 75                                       | 176                       | 3343                    | 47                                                | 176                       | 1666                    |
| 6  | Shar-Pei (T) | 26,710,494  | 41                                       | 547                       | 4363                    | 24                                                | 513                       | 1978                    |
| 7  | Shar-Pei (T) | 23,132,652  | 30                                       | 214                       | 7942                    | 18                                                | 204                       | 3952                    |

<sup>1</sup>Proportion of reads aligned the dog reference sequence (CanFam 2.0)

<sup>2</sup>Average number of sequences covering each base position

<sup>3</sup>Number of SNPs identified in each resequenced individual compared to the reference genome (CanFam 2.0)
