# Supplementary material
Source: PubMed Central journal article supplement (PMC3060080)
Supplement: pgen.1001332.s008.pdf [file pgen.1001332.s008.pdf]

**Table S5. SNPs identified in conserved elements, *HAS2* and *HAS2 antisense* after targeted sequencing.**

The dogs used for targeted sequencing were as follows: Control 1= Pug, Control 2= Napolitan Mastiff, Control 3= Standard Poodle, Shar-Pei 1-2 are of meatmouth type and Shar-Pei 3-4 are of the traditional type. Seven SNPs in conserved elements around *HAS2* and two SNPs (Chr 13: 23,348,686 and 23,379,995) in *HAS2* and *HAS2 antisense* only appeared in the four sequenced Shar-Pei dogs and not in control breeds but excluded as causative for the breed-specific skin phenotype (hyaluronanosis) after further genotyping in more control breeds.

| <b>HAS2</b>           |                    |          |              |          |          |              |          |              |          |                                  |                                          |
|-----------------------|--------------------|----------|--------------|----------|----------|--------------|----------|--------------|----------|----------------------------------|------------------------------------------|
| Site on Chr. 13       | Location**         | Ref*     | Control dogs |          |          | Shar-Pei (M) |          | Shar-Pei (T) |          | Shar-Pei unique in targeted seq. | Shar-Pei unique after further genotyping |
|                       |                    |          | 1            | 2        | 3        | 4            | 5        | 6            | 7        |                                  |                                          |
| 23379407              | 744 bp up upstream | A        | A            | A/C      | A/C      | A            | A        | C            | A/C      | NO                               | NO                                       |
| 23379370              | 707 bp upstream    | G        | G            | G        | G        | A/G          | G        | G            | G        | NO                               | NO                                       |
| 23379364              | 701 bp upstream    | G        | G            | G        | G        | T            | G        | G            | G        | NO                               | NO                                       |
| 23379182              | 519 bp upstream    | C        | G            | C        | C        | C            | C        | C            | C        | NO                               | NO                                       |
| 23379176              | 513 bp upstream    | G        | C            | G/C      | C        | G            | G        | G            | G        | NO                               | NO                                       |
| 23378855              | 192 bp upstream    | C        | G            | C        | C        | C            | C        | G            | C        | NO                               | NO                                       |
| 23348967              | Exon 4             | G        | G            | A/G      | G        | G            | G        | G            | G        | NO                               | NO                                       |
| 23348757              | 3'UTR              | G        | A            | A        | A/G      | G            | G        | G            | G        | NO                               | NO                                       |
| <b>23348686</b>       | <b>3'UTR</b>       | <b>T</b> | <b>T</b>     | <b>T</b> | <b>T</b> | <b>G</b>     | <b>G</b> | <b>G</b>     | <b>G</b> | <b>YES</b>                       | <b>NO</b>                                |
| 23347967              | 3'UTR              | G        | G            | G        | A/G      | A            | G        | T            | T        | NO                               | NO                                       |
| 23347942              | 3'UTR              | T        | T            | C        | T        | T            | T        | T            | T        | NO                               | NO                                       |
| 23347858              | 3'UTR              | T        | T            | G        | T        | T            | T        | T            | T        | NO                               | NO                                       |
| <b>HAS2 antisense</b> |                    |          |              |          |          |              |          |              |          |                                  |                                          |
| 23375850              | 853 bp upstream    | C        | C            | A        | C        | C            | C        | C            | C        | NO                               | NO                                       |
| 23375850              | 644 bp upstream    | A        | A            | G        | A        | G            | G        | G            | G        | NO                               | NO                                       |
| 23376330              | 373 bp upstream    | T        | T            | T        | T        | T            | A/T      | A            | T        | NO                               | NO                                       |
| 23376461              | 242 bp upstream    | T        | T            | C/T      | C/T      | T            | C/T      | C            | C/T      | NO                               | NO                                       |
| 23376466              | 237 bp upstream    | C        | C            | C        | C        | C            | G/C      | G            | G        | NO                               | NO                                       |
| 23376476              | 227 bp upstream    | T        | T            | C        | T        | T            | T        | T            | T        | NO                               | NO                                       |
| 23376527              | 176 bp upstream    | C        | C            | G/C      | C        | C            | G        | G            | G        | NO                               | NO                                       |

|                                         |                     |          |          |          |          |          |          |          |            |            |    |
|-----------------------------------------|---------------------|----------|----------|----------|----------|----------|----------|----------|------------|------------|----|
| 23376537                                | 166 bp upstream     | C        | C        | C/T      | C        | C        | C        | C        | C          | NO         | NO |
| 23377354                                | Exon 1              | C        | C        | G        | C        | G        | C        | G        | C          | NO         | NO |
| <b>23379995</b>                         | <b>Intron 3****</b> | <b>T</b> | <b>T</b> | <b>T</b> | <b>T</b> | <b>G</b> | <b>G</b> | <b>G</b> | <b>G/T</b> | <b>YES</b> | NO |
| 23381709                                | Exon 4              | T        | A/T      | T        | A/T      | T        | A/T      | T        | T          | NO         | NO |
| 23381736                                | Exon 4              | T        | T        | G/T      | T        | T        | T        | T        | T          | NO         | NO |
| 23381740                                | Exon 4              | C        | C        | A/C      | C        | C        | C        | C        | C          | NO         | NO |
| <b>Conserved elements flanking HAS2</b> |                     |          |          |          |          |          |          |          |            |            |    |
| 23055753                                |                     | G        | G        | G        | G        | A        | A        | A        | A          | <b>YES</b> | NO |
| 23478618                                |                     | G        | G        | G        | G        | A        | A        | A        | A/G        | <b>YES</b> | NO |
| 24399299                                |                     | A        | A        | A        | A        | C        | C        | C        | A          | <b>YES</b> | NO |
| 24110400                                |                     | G        | G        | G        | G        | A        | A        | A        | G          | <b>YES</b> | NO |
| 24301818                                |                     | C        | C        | C        | C        | G        | G        | C        | C          | <b>YES</b> | NO |
| 24344851                                |                     | T        | T        | T        | T        | G        | G        | T        | T          | <b>YES</b> | NO |
| 23516499                                |                     | T        | T        | T        | T        | A        | A        | T        | T          | <b>YES</b> | NO |

Boxer reference \*\* Location annotation corresponds to alignment with human Ensembl transcript ENST00000303924 \*\*\* Location annotation corresponds to alignment with human Ensembl transcript ENST00000514180 \*\*\*\* Intron 3, 2 bp from exon 3  
(M) Meatmouth type Shar-Pei  
(T) Traditional type Shar-Pei
