# Supplementary material
Source: PubMed Central journal article supplement (PMC3060080)
Supplement: pgen.1001332.s009.pdf [file pgen.1001332.s009.pdf]

**Table S6. Primers and probes used in the different experiments.**

|                                                  | Forward primer 5'-3'                                                                                                                                                                                                                                                                                                                                                                                                                                                                                                                                                                                                                                                                                                                                                                                                                                                                                                                                                                                 | Reverse primer 5'-3'       | T <sub>m</sub> (C°) |
|--------------------------------------------------|------------------------------------------------------------------------------------------------------------------------------------------------------------------------------------------------------------------------------------------------------------------------------------------------------------------------------------------------------------------------------------------------------------------------------------------------------------------------------------------------------------------------------------------------------------------------------------------------------------------------------------------------------------------------------------------------------------------------------------------------------------------------------------------------------------------------------------------------------------------------------------------------------------------------------------------------------------------------------------------------------|----------------------------|---------------------|
| <b>Mutation screening</b>                        |                                                                                                                                                                                                                                                                                                                                                                                                                                                                                                                                                                                                                                                                                                                                                                                                                                                                                                                                                                                                      |                            |                     |
| Chr13: 23,055,753 (SNP)                          | GGTGAAGGAAACCCCTTCC                                                                                                                                                                                                                                                                                                                                                                                                                                                                                                                                                                                                                                                                                                                                                                                                                                                                                                                                                                                  | TGGGGCATACTAAACTCCCA       | 55                  |
| Chr13: 23,348,686 (SNP)                          | GCATCGCTTCTCTCCATCTC                                                                                                                                                                                                                                                                                                                                                                                                                                                                                                                                                                                                                                                                                                                                                                                                                                                                                                                                                                                 | GCTCACTGATGCTGCTCAAC       | 55                  |
| Chr13: 23,379,995 (SNP)                          | TCACTAATCTGGCCCTCGAC                                                                                                                                                                                                                                                                                                                                                                                                                                                                                                                                                                                                                                                                                                                                                                                                                                                                                                                                                                                 | GGGTAATGCTTCCCAGAGGT       | 57                  |
| Chr13: 23,478,618 (SNP)                          | GGTGACGTCTGGATTGGATT                                                                                                                                                                                                                                                                                                                                                                                                                                                                                                                                                                                                                                                                                                                                                                                                                                                                                                                                                                                 | ACTTCCCACCTTTGCCTACC       | 60                  |
| Chr13: 23,504,114 (deletion)                     | AACGGAAGCACTGAATCAAA                                                                                                                                                                                                                                                                                                                                                                                                                                                                                                                                                                                                                                                                                                                                                                                                                                                                                                                                                                                 | GCAAATCCAAGCCCTATTCA       | 59                  |
| Chr13: 23,516,499 (SNP)                          | GGTTTGCTCTGACAGCTTCC                                                                                                                                                                                                                                                                                                                                                                                                                                                                                                                                                                                                                                                                                                                                                                                                                                                                                                                                                                                 | TGCTCAAATGACCACATTTTT      | 56                  |
| Chr13: 24,110,400 (SNP)                          | CAAATGTGCTGATGGAACG                                                                                                                                                                                                                                                                                                                                                                                                                                                                                                                                                                                                                                                                                                                                                                                                                                                                                                                                                                                  | AACTGCAGCCACATGTGAAG       | 60                  |
| Chr13: 24,301,818 (SNP)                          | CTTACCTTCCCAGACTGCTCA                                                                                                                                                                                                                                                                                                                                                                                                                                                                                                                                                                                                                                                                                                                                                                                                                                                                                                                                                                                | TCCTCTCTAACTTAAAACCGGT     | 55                  |
| Chr13: 24,344,851 (SNP)                          | GCAGGGCATTTTTGAGGTAG                                                                                                                                                                                                                                                                                                                                                                                                                                                                                                                                                                                                                                                                                                                                                                                                                                                                                                                                                                                 | GAATAGCCCTGTGGGGTGT        | 60                  |
| Chr13: 24,399,299 (SNP)                          | TCACTCCTGCTCACATCTGG                                                                                                                                                                                                                                                                                                                                                                                                                                                                                                                                                                                                                                                                                                                                                                                                                                                                                                                                                                                 | TCTCGACAGACACCGTTTCA       | 60                  |
| <b>Identification of duplication breakpoints</b> |                                                                                                                                                                                                                                                                                                                                                                                                                                                                                                                                                                                                                                                                                                                                                                                                                                                                                                                                                                                                      |                            |                     |
| Meatmouth duplication                            | GCTCAGAGTGCATAGGTCTC<br>AAGGA                                                                                                                                                                                                                                                                                                                                                                                                                                                                                                                                                                                                                                                                                                                                                                                                                                                                                                                                                                        | TTTTGGGGTTTTGTTGCTATTGTTGT | 65                  |
| Traditional duplication                          | ACTACGTTGATGGCCTCTG                                                                                                                                                                                                                                                                                                                                                                                                                                                                                                                                                                                                                                                                                                                                                                                                                                                                                                                                                                                  | GGGAGCCATACAAGCAAAA        | 60                  |
| <b>Southern Blot</b>                             |                                                                                                                                                                                                                                                                                                                                                                                                                                                                                                                                                                                                                                                                                                                                                                                                                                                                                                                                                                                                      |                            |                     |
| Probe                                            | TAGATCATGCCTTGCTACCTGAAAGTTGGAATAATGCAAACCTTATTCCTTTAAATAAA<br>GACTATTCATTACAAGTAATTTTTTAAACTTGACAATGGTTTGATGTTAGAATGCTT<br>TTAATTTCAAGTAAATCCATCCAACAGTGGCTGAAACAAATAAGGGATTGCTTTTTTG<br>TGCCTGTCTCTTCAAATTACAAGGCATCTGGAGAGAGCTAGCTACTGGCAGTGGTT<br>CAACAGCTCAGCTGCATCAGGTGACTGTCAGATCTTCTCAGCTTTTACTTACATAT<br>ATACAAGGTGAATTGCAAACCTTAGGCATCATACCCATGGATTTTAAGGCAGAAGGAA<br>AGAGCAGTAGCTTCGGGGTACTCTTAAAGCAAACGCTTTCAAAAAGCCTGCTGCT<br>TATGTTTCATTTGTCTAGTGCTGTGTTAAAAAGCTATCCTTGGATAAAAGGGAGGCT<br>GGGGAGATCCTAAAAATCCCTAGGCATTGTAATGAAATACCTAAAGGAAATAAAGT<br>GCTCTACAGACTGCCTAATAGATAATAAGACTGCCAAAAGAGGCGTTATAAAACCAA<br>AAATAACAACAATAGCAACAAAACCCCAAAAAACAAAAACTGTACTCAGGATTTTCA<br>GTTGTATGGTAGCAATATCTTTTATTGTATCACCATGAAAATTAATAAAACAATTTT<br>AGAAAAATTTATTGAGCTCTTACAGATATCAGGTAGCCTTGGCTTTGGAGACAAGTT<br>AGAATAGTACAGAGTCTTATTACAGAGCTCACTTTCTAATAGGGAAACTGAGTGT<br>AAATCAATAGATTCAAGAATTGATAAATCCAGGAAGAAGACAGAAGTAGGTTAAATT<br>GAAGAAAGGGATTTATGGTTGCCAGGGAGAGTGTTGGGTAACAATGGTTAGG |                            |                     |
| <b>Quantitative PCR, Copy Number Assay</b>       |                                                                                                                                                                                                                                                                                                                                                                                                                                                                                                                                                                                                                                                                                                                                                                                                                                                                                                                                                                                                      |                            |                     |
| Meatmouth copy assay-primers                     | TTATGTTTTGCTGCCCTAGTC<br>AGA                                                                                                                                                                                                                                                                                                                                                                                                                                                                                                                                                                                                                                                                                                                                                                                                                                                                                                                                                                         | ACCTGGCACCTGAGCAACTT       | 56                  |
| Meatmouth copy assay-probe                       | FAM-CTGCTGAAAAGACACATGT-MGBNFQ                                                                                                                                                                                                                                                                                                                                                                                                                                                                                                                                                                                                                                                                                                                                                                                                                                                                                                                                                                       |                            |                     |
| Traditional copy assay-primers                   | TGCAGTTGTCATGTCGCAA                                                                                                                                                                                                                                                                                                                                                                                                                                                                                                                                                                                                                                                                                                                                                                                                                                                                                                                                                                                  | TGGAGTGATTCGTTGGTTTCT      | 56                  |
| Traditional copy assay-probe                     | FAM-ACACCACGTGACTTGT-MGB                                                                                                                                                                                                                                                                                                                                                                                                                                                                                                                                                                                                                                                                                                                                                                                                                                                                                                                                                                             |                            |                     |
| Housekeeping gene-primers                        | TTGTGCAGGATCAGAGCATC                                                                                                                                                                                                                                                                                                                                                                                                                                                                                                                                                                                                                                                                                                                                                                                                                                                                                                                                                                                 | CAACACAGGTTGACCAAGGA       | 55                  |
| Housekeeping gene-probe                          | VIC- TGCCATTTGTGTGCATCCCA-TAMRA                                                                                                                                                                                                                                                                                                                                                                                                                                                                                                                                                                                                                                                                                                                                                                                                                                                                                                                                                                      |                            |                     |
| <b>Expression study</b>                          |                                                                                                                                                                                                                                                                                                                                                                                                                                                                                                                                                                                                                                                                                                                                                                                                                                                                                                                                                                                                      |                            |                     |
| Houskeeping gene                                 | CCGCGACGAGAAGGTCAA                                                                                                                                                                                                                                                                                                                                                                                                                                                                                                                                                                                                                                                                                                                                                                                                                                                                                                                                                                                   | GGGTCATCCAGGTACCCTTTG      |                     |
| HAS2                                             | CTTCAGAGCACTGGGACGAAGT                                                                                                                                                                                                                                                                                                                                                                                                                                                                                                                                                                                                                                                                                                                                                                                                                                                                                                                                                                               | TCTAAAACCTTCCACATCTCCACAGA |                     |
| HAS2as                                           | ACTGGGTGGGTAATCTTTCCA                                                                                                                                                                                                                                                                                                                                                                                                                                                                                                                                                                                                                                                                                                                                                                                                                                                                                                                                                                                | GGAGGCAGAAAGCAACAACAG      |                     |
